# Supplementary material for: Knowledge of non-communicable diseases and practices related to healthy lifestyles among adolescents, in state schools of a selected educational division in Sri Lanka
Source: PubMed Central journal article supplement (PMC5530461; doi:10.1186/s12889-017-4622-z), 2017-07-26
Supplement: 12889_2017_4622_MOESM1_ESM.pdf [file 12889_2017_4622_MOESM1_ESM.pdf]

අනුක්‍රමික අංකය : .....

දිනය : .....

මෙම සමීක්ෂණය සිදු කරන්නේ යොවනියන්ගේ බෝ නොවන රෝග හා ඒවායේ ප්‍රාථමික සංරක්ෂණ ක්‍රම පිළිබඳ දැනුම හා මෙම රෝග වලින් වැළකීමට ඔබ දරන ප්‍රතිපත්ති පිළිබඳ පරීක්ෂා කිරීමටය. මෙමගින් ලබාගන්නා නිගමනයන් ඔබ වැනිම තුරුණු වියේ පසුවන්නන් සඳහා විවිධ සෞඛ්‍ය, අධ්‍යාපනික වැඩසටහන් නිර්මාණයට යොදා ගැනේ.

මෙම සමීක්ෂණයේදී ඔබ ලබාදෙන තොරතුරුවල රහස්‍යභාවය සුරකින බවට සහතික වෙමි. මෙම ප්‍රශ්න පත්‍රයට පිළිතුරු සැපයීමට හා නොසැපයීම ඔබගේ කැමැත්ත මත සිදුකරන්න. මෙයට පිළිතුරු සැපයුවද නොසැපයුවද එය කිසියම් අගුරකින් ඔබගේ අධ්‍යාපනික කටයුතු සඳහා බලනොපානු ඇත. ප්‍රශ්න පත්‍රයේ ඔබගේ නම නොලියන්න.

ඔබගේ සහයෝගයට ස්තූතියි.

- පිළිතුරු සැපයීමේදී පැහැක් පාවිච්චි කරන්න.
- මෙම ප්‍රශ්න පත්‍රය හොඳින් කියවා පිළිතුරු සපයන්න.
- ප්‍රශ්නය හොඳින් කියවා අදාළ කොටුවෙහි (✓) සලකණු කරන්න.
- කඩ ඉරි යොදා ඇති ස්ථාන මත පිළිතුරු ලියන්න.

|    |                                      |                                                                      |             |
|----|--------------------------------------|----------------------------------------------------------------------|-------------|
| 1. | ඔබගේ වයස                             |                                                                      | S1          |
| 2. | උපන් දිනය                            | දිනය <input type="text"/>                                            | S2          |
|    |                                      | මාසය <input type="text"/>                                            |             |
|    |                                      | වර්ෂය <input type="text"/>                                           |             |
| 3. | ස්ත්‍රී / පුරුෂ භාවය                 | ස්ත්‍රී <input type="checkbox"/>                                     | S3          |
|    |                                      | පුරුෂ <input type="checkbox"/>                                       |             |
| 4. | පාසැලේ නම                            | .....                                                                | S4          |
| 5. | ඔබගේ ජාතිය                           | 1. සිංහල <input type="checkbox"/>                                    | S5          |
|    |                                      | 2. දෙමළ <input type="checkbox"/>                                     |             |
|    |                                      | 3. මුස්ලිම් <input type="checkbox"/>                                 |             |
|    |                                      | 4. බර්ගර් <input type="checkbox"/>                                   | S5<br>Other |
|    |                                      | 5. වෙනත් (සඳහන් කරන්න.).....                                         |             |
| 6. | උසස් පෙළ සඳහා හඳුරන විෂය මාලාව       | 1. විද්‍යාව <input type="checkbox"/>                                 | S6          |
|    |                                      | 2. ගණිතය <input type="checkbox"/>                                    |             |
|    |                                      | 3. කලා <input type="checkbox"/>                                      |             |
|    |                                      | 4. වාණිජ <input type="checkbox"/>                                    |             |
| 7. | a) ඔබගේ පියා දැනට රැකියාවක් කරන්නේද? | 1. ඔව් <input type="checkbox"/> ප්‍රශ්න අංක 7b ට පිළිතුරු සපයන්න.    | S7          |
|    |                                      | 2. නැත <input type="checkbox"/> ප්‍රශ්න අංක 8 ට පිළිතුරු සපයන්න.     |             |
|    | b). ඔබගේ පියාගේ රැකියාව              | .....                                                                | S8          |
| 8. | ඔබගේ පියාගේ අධ්‍යාපන මට්ටම           | 1. පාසැල් අධ්‍යාපනය ලබා නොමැත <input type="checkbox"/>               | S9          |
|    |                                      | 2. 1 ශ්‍රේණියේ සිට 5 ශ්‍රේණිය දක්වා <input type="checkbox"/>         |             |
|    |                                      | 3. 6-10 ශ්‍රේණි දක්වා <input type="checkbox"/>                       |             |
|    |                                      | 4. අධ්‍යාපන පොදු සහතික පත්‍ර (සා: පෙළ) සමත් <input type="checkbox"/> |             |
|    |                                      | 5. අධ්‍යාපන පොදු සහතික පත්‍ර (උ: පෙළ) දක්වා <input type="checkbox"/> |             |
|    |                                      | 6. අධ්‍යාපන පොදු සහතික පත්‍ර (උ: පෙළ) සමත් <input type="checkbox"/>  |             |
|    |                                      | 7. විශ්ව විද්‍යාල අධ්‍යාපනය හෝ ඊට සමාන <input type="checkbox"/>      |             |
|    |                                      | 8. නොදනී <input type="checkbox"/>                                    |             |
| 9. | a) ඔබගේ මව දැනට රැකියාවක් කරන්නේද?   | 1. ඔව් <input type="checkbox"/> ප්‍රශ්න අංක 9b ට පිළිතුරු සපයන්න.    | S10         |
|    |                                      | 2. නැත <input type="checkbox"/> ප්‍රශ්න අංක 10 ට පිළිතුරු සපයන්න.    |             |
|    | b) මවගේ රැකියාව                      | .....                                                                | S11         |

|                                                                                                           |                                                   |                          |                |
|-----------------------------------------------------------------------------------------------------------|---------------------------------------------------|--------------------------|----------------|
| 10. ඔබගේ මවගේ අධ්‍යාපන මට්ටම                                                                              | 1. පාසැල් අධ්‍යාපනය ලබා නොමැත                     | <input type="checkbox"/> | S12            |
|                                                                                                           | 2. 1 ශ්‍රේණියේ සිට 5 ශ්‍රේණිය දක්වා               | <input type="checkbox"/> |                |
|                                                                                                           | 3. 6-10 ශ්‍රේණි දක්වා                             | <input type="checkbox"/> |                |
|                                                                                                           | 4. අධ්‍යාපන පොදු සහතික පත්‍ර (සා: පෙළ) සමත්       | <input type="checkbox"/> |                |
|                                                                                                           | 5. අධ්‍යාපන පොදු සහතික පත්‍ර (උ: පෙළ) දක්වා       | <input type="checkbox"/> |                |
|                                                                                                           | 6. අධ්‍යාපන පොදු සහතික පත්‍ර (උ: පෙළ) සමත්        | <input type="checkbox"/> |                |
|                                                                                                           | 7. විශ්ව විද්‍යාල අධ්‍යාපනය හෝ ඊට සමාන            | <input type="checkbox"/> |                |
|                                                                                                           | 8. නොදනී                                          | <input type="checkbox"/> |                |
| 11. ඔබගේ නිවසේ ප්‍රධාන පාතිය පල මාර්ගය<br>නැත්තේ?                                                         | 1. නිවසේ පිහිටා ඇති ආරක්ෂිත ලිඳ                   | <input type="checkbox"/> | S13            |
|                                                                                                           | 2. නිවසින් පිටත පිහිටා ඇති ආරක්ෂිත ලිඳ            | <input type="checkbox"/> |                |
|                                                                                                           | 3. ලිඳකින්                                        | <input type="checkbox"/> |                |
|                                                                                                           | 4. ගෘහස්ථ පල සැපයුම් පද්ධතිකින්                   | <input type="checkbox"/> |                |
|                                                                                                           | 5. මහ පාරේ සවිකර ඇති පොදු පල මාර්ග<br>පද්ධතියකින් | <input type="checkbox"/> |                |
|                                                                                                           | 6. පල බවිසර් මගින් රැගෙන එන පලය                   | <input type="checkbox"/> |                |
| 12. ඔබගේ නිවසේ ඇති වැසිකිලි පහසුකම් කුමන<br>වර්ගයට අයත්වේද?                                               | 1. පල මුද්‍රිත වැසිකිලිය                          | <input type="checkbox"/> | S14            |
|                                                                                                           | 2. වල වැසිකිලිය                                   | <input type="checkbox"/> |                |
|                                                                                                           | 3. බාල්දි වැසිකිලිය                               | <input type="checkbox"/> |                |
|                                                                                                           | 4. නැත                                            | <input type="checkbox"/> |                |
| 13. ඔබගේ නිවසේ පහත සඳහන් දෑ ඇත්නම්<br>✓ ලකුණ ද නැතිනම් X ලකුණ ද යොදන්න<br>පිළිතුරු එකකට වඩා ලකුණු කල හැක. | 1. විදුලිය                                        | <input type="checkbox"/> | S15 a          |
|                                                                                                           | 2. ගුවන් විදුලි යන්ත්‍රයක්                        | <input type="checkbox"/> | S15 b          |
|                                                                                                           | 3. රූපවාහිනී යන්ත්‍රයක්                           | <input type="checkbox"/> | S15 c          |
|                                                                                                           | 4. ශිතකරණය                                        | <input type="checkbox"/> | S15 d          |
|                                                                                                           | 5. දුරකථනයක්                                      | <input type="checkbox"/> | S15 e          |
| 14. ඔබගේ පවුලේ කිනම් සාමාජිකයෙකුට හෝ පහත<br>සඳහන් වාහන හිමි නම්<br>✓ ලකුණ ද නැතිනම් X ලකුණ ද යොදන්න.      | 1. බයිසිකලයක්                                     | <input type="checkbox"/> | S16 a          |
|                                                                                                           | 2. කාර්                                           | <input type="checkbox"/> | S16 b          |
|                                                                                                           | 3. මෝටර් බයිසිකලයක්                               | <input type="checkbox"/> | S16 c          |
|                                                                                                           | 4. වෑන් රථයක්                                     | <input type="checkbox"/> | S16 d          |
|                                                                                                           | 5. ට්‍රැක්ටරයක්                                   | <input type="checkbox"/> | S16 e          |
|                                                                                                           | 6. වෙනත් (සඳහන් කරන්න).....                       |                          | S16 f<br>Other |
| 15. ඔබගේ නිවසේ පොලොවට යොදා ඇත්තේ<br>මින් කවරක්ද?                                                          | 1. ටේරාසෝ / ග්‍රැන්ඩ්ට් / ටයිල්                   | <input type="checkbox"/> | S17            |
|                                                                                                           | 2. සිමෙන්ති                                       | <input type="checkbox"/> |                |
|                                                                                                           | 2. දූව                                            | <input type="checkbox"/> |                |
|                                                                                                           | 4. ගොම / මැටි                                     | <input type="checkbox"/> |                |
|                                                                                                           | 5. වැලි                                           | <input type="checkbox"/> |                |

**02 පුරුදු**

| ආහාර පුරුදු                                                                                           |                                                          |                          |      |
|-------------------------------------------------------------------------------------------------------|----------------------------------------------------------|--------------------------|------|
| 16. ඔබ උදේ ආහාරය වශයෙන් ගෙදරදී පිලියෙල කෙරූ ආහාර භාවිතා කරන සම්භාවිතාව වන්නේ                          | 1. සැමදිනකදීම                                            | <input type="checkbox"/> | F1   |
|                                                                                                       | 2. සතියේ දින 5 දී                                        | <input type="checkbox"/> |      |
|                                                                                                       | 3. සතියේ දින 3 දී                                        | <input type="checkbox"/> |      |
|                                                                                                       | 4. සති අන්තයේදී                                          | <input type="checkbox"/> |      |
|                                                                                                       | 5. සතියට තුන්වරක් පමණ                                    | <input type="checkbox"/> |      |
|                                                                                                       | 6. මසකට වරක් පමණක්                                       | <input type="checkbox"/> |      |
|                                                                                                       | 7. කිසිවිටක නොමැත                                        | <input type="checkbox"/> |      |
| 17. ඔබ පහත සඳහන් ආහාර වර්ග උදේ ආහාරය වශයෙන් සතියකට දින කිහිපයක් භාවිතා කරනු ලබන්නේද යන්න සඳහන් කරන්න. | 1. බත් හා මාළුපිති                                       | <input type="checkbox"/> | F2 a |
|                                                                                                       | 2. හාල් පිටි වලින් සෑදූ ආහාර<br>උදා: ඉඳිආපප, පිට්ටු, ආපප | <input type="checkbox"/> | F2 b |
|                                                                                                       | 3. මුං ඇට/ කඩල වැනි දෑ                                   | <input type="checkbox"/> | F2 c |
|                                                                                                       | 4. පාන් සමග මාළුපිති                                     | <input type="checkbox"/> | F2 d |
|                                                                                                       | 5. සැන්ඩ්විච්ස්                                          | <input type="checkbox"/> | F2 e |
|                                                                                                       | 6. වයිනිස් රෝල්ස්, පේස්ට්, කට්ලට්                        | <input type="checkbox"/> | F2 f |
| 18. ඔබේ අදහස අනුව පවුලේ අනිකුත් සාමාජිකයින්ට සාපේක්ෂව ඔබට ආහාර සඳහා වැඩියෙන් ලුණු අවශ්‍ය වේද          | 1. ඔව්, සැමවිටම                                          | <input type="checkbox"/> | F3   |
|                                                                                                       | 2. ඔව් සැමවිටම නොව නමුත් ලුණු මදිවූ විට                  | <input type="checkbox"/> |      |
|                                                                                                       | 3. කිසිවිටක නොමැත                                        | <input type="checkbox"/> |      |

මිලට ප්‍රශ්න ඔබ සාමාන්‍යයෙන් කැමට ගන්නා ආහාර හෝ බීම ජාති හා බැඳේ. උදාහරණයක් ලෙස සතියකට වරක් සතියකට දෙවරක්..... මතක තබාගත යුතුයි වැදගත් කරුණ වන්නේ මෙය ඔබ ගන්නා ආහාර පිලිබදවයි. එබැවින් මෙම ප්‍රශ්න ඔබ ගෙදරදී සහ පිටතදී ගන්නා සියළු ආහාර පිලිබද බැඳේ

|                                                                                                   |                       |                          |    |
|---------------------------------------------------------------------------------------------------|-----------------------|--------------------------|----|
| 19. ඔබ පලතුරු බීම පාවිච්චියට ගන්නා සම්භාවිතාවය වන්නේ (ස්වභාවික)                                   | 1. සැමදිනකදීම         | <input type="checkbox"/> | F4 |
|                                                                                                   | 2. සතියේ දින 5 දී     | <input type="checkbox"/> |    |
|                                                                                                   | 3. සතියට තුන්වරක් පමණ | <input type="checkbox"/> |    |
|                                                                                                   | 4. සති අන්තයේදී       | <input type="checkbox"/> |    |
|                                                                                                   | 5. මසකට වරක් පමණක්    | <input type="checkbox"/> |    |
|                                                                                                   | 6. කිසිවිටක නොමැත     | <input type="checkbox"/> |    |
| 20. ඔබ කෘත්‍රීම බීම වර්ග උදා: කොකා කෝලා, ෆැන්ටා, ක්‍රීමිසෝඩා වැනි බීම භාවිතා කරන සම්භාවිතාව වන්නේ | 1. සැමදිනකදීම         | <input type="checkbox"/> | F5 |
|                                                                                                   | 2. සතියේ දින 5 දී     | <input type="checkbox"/> |    |
|                                                                                                   | 3. සතියට තුන්වරක් පමණ | <input type="checkbox"/> |    |
|                                                                                                   | 4. සති අන්තයේදී       | <input type="checkbox"/> |    |
|                                                                                                   | 5. මසකට වරක් පමණක්    | <input type="checkbox"/> |    |
|                                                                                                   | 6. කිසිවිටක නොමැත     | <input type="checkbox"/> |    |

|                                                                                                                                                                                                                                                                                                  |                                          |                          |      |
|--------------------------------------------------------------------------------------------------------------------------------------------------------------------------------------------------------------------------------------------------------------------------------------------------|------------------------------------------|--------------------------|------|
| 21. ඔබ පලතුරු කැමට ගන්නා සම්භාවිතාව වන්නේ සතියකට කී වරක්ද                                                                                                                                                                                                                                        | 1. සැමදිනකදීම                            | <input type="checkbox"/> | F6   |
|                                                                                                                                                                                                                                                                                                  | 2. සතියේ දින 5 දී                        | <input type="checkbox"/> |      |
|                                                                                                                                                                                                                                                                                                  | 3. සතියට තුන්වරක් පමණ                    | <input type="checkbox"/> |      |
|                                                                                                                                                                                                                                                                                                  | 4. සතියකට දෙවරක් පමණ                     | <input type="checkbox"/> |      |
|                                                                                                                                                                                                                                                                                                  | 5. මසකට වරක් පමණක්                       | <input type="checkbox"/> |      |
|                                                                                                                                                                                                                                                                                                  | 6. කිසිවිටක නොමැත                        | <input type="checkbox"/> |      |
| 22. ඔබ සාමාන්‍යයෙන් ඵලවළු හා පලාවර්ග බෙදීම (Serving) කොපමණ දිනකට අනුව කරන්නේද? එක් බෙදීමක් යනු ඵලවළු හෝ පලා වර්ග මේස හැදී 02 කී උදා- ඔබ දිවා ආහාරය සඳහා ඵලවළු පාති 02ක් ආහාරයට ගත්තේ නම් එය ඵලවළු බෙදීම (Serving) 02 ක් ලෙස සැලකේ. එලෙස ඔබ එක් දිනයක් තුළදී ආහාරයට ගන්නා ඵලවළු හා පලා බෙදීම් ගණන | 1. ඔබ දිනක ආහාරයට ගන්නා ඵලවළු බෙදීම් ගණන | <input type="checkbox"/> | F7 a |
|                                                                                                                                                                                                                                                                                                  | 2. ඔබ දිනකට ආහාරයට ගන්නා පලා බෙදීම් ගණන  | <input type="checkbox"/> | F7 b |

**ව්‍යායාම පිලිබදව**

|                                                                         |                                            |                          |    |
|-------------------------------------------------------------------------|--------------------------------------------|--------------------------|----|
| 23. ශාරීරික ව්‍යායාම ඔබගේ සෞඛ්‍යයට යෝග්‍ය යැයි ඔබ සිතනවාද               | 1. ඔව්                                     | <input type="checkbox"/> | E1 |
|                                                                         | 2. නැත                                     |                          |    |
|                                                                         | 3. නොදනි                                   |                          |    |
| 24. ඔබ කිසියම් හෝ ශාරීරික/ ව්‍යායාම ව්‍යායාමයක යෙදෙනවාද?                | 1. ඔව් <input type="checkbox"/>            | ප්‍රශ්න අංක 25 ට යන්න    | E2 |
|                                                                         | 2. නැත <input type="checkbox"/>            | ප්‍රශ්න අංක 28 ට යන්න    |    |
| 25. ඔබ යෙදෙන්නා වූ ශාරීරික ව්‍යායාම වන්නේ (එකක් හෝ කීපයක් ලකුණු කල හැක) | 1. ක්‍රීඩා - උදා ක්‍රිකට් පිහිනීම නෙට්බෝල් | <input type="checkbox"/> | E3 |
|                                                                         | 2. ස්වච්ඡා ව්‍යායාම (එරොබික්ස්)            | <input type="checkbox"/> |    |
|                                                                         | 3. යෝග ව්‍යායාම                            | <input type="checkbox"/> |    |
|                                                                         | 4. නැටුම්                                  | <input type="checkbox"/> |    |
|                                                                         | 5. වෙනත් (සඳහන් කරන්න).....                |                          |    |
| 26. ඔබ ව්‍යායාම කරන දිනයන්හි ඒ සඳහා ගත කරන කාල වේලාව වන්නේ              | 1. < මිනිත්තතු 30                          | <input type="checkbox"/> | E4 |
|                                                                         | 2. මිනිත්තතු 30                            | <input type="checkbox"/> |    |
|                                                                         | 3. < මිනිත්තතු 45                          | <input type="checkbox"/> |    |
|                                                                         | 4. මිනිත්තතු 45                            | <input type="checkbox"/> |    |
|                                                                         | 5. පැය යි                                  | <input type="checkbox"/> |    |
|                                                                         | 6. නිසැකව කිව නොහැක                        | <input type="checkbox"/> |    |
|                                                                         | 7. වෙනත් (සඳහන් කරන්න).....                |                          |    |
| 27. ඔබ ඉහත සඳහන් ව්‍යායාමවල සතියකට දින කීයක් යෙදෙනවාද?                  | 1. සතියකට දින                              | <input type="checkbox"/> | E5 |
|                                                                         | 2. කිසිවක් කිව නොහැක                       | <input type="checkbox"/> |    |

**දුමපානය පිළිබඳ**

මෙම දිනවල ලාබාල අවධියේ සිට පුද්ගලයන් දුමපානය කරනු ලැබේ. ස්ත්‍රී පුරුෂ දෙපාර්ශවයම මේ ක්‍රියාවලි වල යෙදෙන බව අධ්‍යයනයන්ගෙන් සොයාගෙන ඇත. මිත්‍රයන්ගේ බලපෑම හානිකර ප්‍රතිඵල පිළිබඳ දැනුම නැතිවීම හා කුතුහලය මේවාගේ නිරත වීම හේතු කිහිපයකි.

|     |                                      |                                                    |                        |    |
|-----|--------------------------------------|----------------------------------------------------|------------------------|----|
| 28. | ඔබ කිසිදිනක දුමපානය කර තිබේද?        | 1. ඔව් <input type="checkbox"/>                    | ප්‍රශ්න අංක 32 ට යන්න. | T1 |
|     |                                      | 2. නැත <input type="checkbox"/>                    | ප්‍රශ්න අංක 37 ට යන්න  |    |
| 29. | ඔබ දැනට දුමපානය කරන්නේද?             | 1. ඔව් <input type="checkbox"/>                    | ප්‍රශ්න අංක 33 ට යන්න  | T2 |
|     |                                      | 2. නැත <input type="checkbox"/>                    | ප්‍රශ්න අංක 35 ට යන්න  |    |
| 30. | ඔබ දුමපානය කරන වාර ගණන කුමක්ද?       | 1. දිනපතා <input type="checkbox"/>                 | T3                     |    |
|     |                                      | 2. සතියේ දින 5 දී <input type="checkbox"/>         |                        |    |
|     |                                      | 3. සතියකට දින 3ක් පමණ <input type="checkbox"/>     |                        |    |
|     |                                      | 4. සති අන්තයේදී <input type="checkbox"/>           |                        |    |
|     |                                      | 5. මසකට සැරයක් පමණක් <input type="checkbox"/>      |                        |    |
|     |                                      | 6. උත්සව අවස්ථාවකදී පමණක් <input type="checkbox"/> |                        |    |
|     |                                      | 7. ඉඳහිට <input type="checkbox"/>                  |                        |    |
| 31. | ඔබ දිනකට සිගරට් කියක් පානය කරන්නේද?  | .....                                              | T4                     |    |
| 32. | ඔබ පලමු වරට දුමපානය කරන විට ඔබගේ වයස | 1. වයස <input type="checkbox"/>                    | T5                     |    |
|     |                                      | 2. මහක නැත <input type="checkbox"/>                |                        |    |

**මධ්‍යසාර භාවිතය**

මෙම දිනවල ලාබාල අවධියේ සිට පුද්ගලයන් මධ්‍යසාර භාවිතා කරනු ලැබේ. ස්ත්‍රී පුරුෂ දෙපාර්ශවයම මේ ක්‍රියාවලි වල යෙදෙන බව අධ්‍යයනයන්ගෙන් සොයාගෙන ඇත. මිත්‍රයන්ගේ බලපෑම හානිකර ප්‍රතිඵල පිළිබඳ දැනුම නැතිවීම හා කුතුහලය මේවාගේ නිරත වීම හේතු කිහිපයකි.

|     |                                             |                                                    |                              |    |
|-----|---------------------------------------------|----------------------------------------------------|------------------------------|----|
| 33. | ඔබ කිසිදිනක හෝ මධ්‍යසාර භාවිත කර 1. තිබේද ? | ඔව් <input type="checkbox"/>                       | ප්‍රශ්න අංක 38               | A1 |
|     |                                             | 2. නැත <input type="checkbox"/>                    | ප්‍රශ්න අංක 43 (බෝ නොවන රෝග) |    |
| 34. | ඔබ දැනට මධ්‍යසාර භාවිතා කරන්නේද ?           | 1. ඔව් (දිනපතා) <input type="checkbox"/>           | ප්‍රශ්න අංක 39 ට යන්න        | A2 |
|     |                                             | 2. නැත <input type="checkbox"/>                    | ප්‍රශ්න අංක 41 ට යන්න        |    |
| 35. | ඔබ මධ්‍යසාර භාවිතා කරන වාර ගණන කුමක්ද?      | 1. දිනපතා <input type="checkbox"/>                 | A3                           |    |
|     |                                             | 2. සතියේ දින 5 දී <input type="checkbox"/>         |                              |    |
|     |                                             | 3. සතියකට දින 3ක් පමණ <input type="checkbox"/>     |                              |    |
|     |                                             | 4. සති අන්තයේදී <input type="checkbox"/>           |                              |    |
|     |                                             | 5. මසකට සැරයක් පමණක් <input type="checkbox"/>      |                              |    |
|     |                                             | 6. උත්සව අවස්ථාවකදී පමණක් <input type="checkbox"/> |                              |    |
|     |                                             | 7. ඉඳහිට <input type="checkbox"/>                  |                              |    |

36. ඔබ සාමාන්‍යයෙන් භාවිතා කරන මධ්‍යසාර වර්ගය හා දිනකට භාවිතා කරන මධ්‍යසාර ප්‍රමාණය සඳහන් කරන්න.

උදා බියර්

✓

750ml බෝතල් 1\2

| මධ්‍යසාර වර්ගය අදාළ | පිලිතුර ලකුණු කරන්න | වරකට ගන්නා ප්‍රමාණය 750ml බෝතල් වලින් සඳහන් කරන්න |      |
|---------------------|---------------------|---------------------------------------------------|------|
| 1. බියර්            |                     |                                                   | A4 a |
| 2. වයින්            |                     |                                                   | A4 b |
| 3. අරක්කු           |                     |                                                   | A4 c |
| 4. පින්             |                     |                                                   | A4 d |
| 5. විස්කි           |                     |                                                   | A4 e |
| 6. බ්‍රැන්ඩි        |                     |                                                   | A4 f |

|                                                       |                                     |    |
|-------------------------------------------------------|-------------------------------------|----|
| 37. ඔබ පලමුවරට මධ්‍යසාර භාවිතා කරන විට ඔබගේ වයස වුයේ? | 1. වයස <input type="checkbox"/>     | A5 |
|                                                       | 2. මහක නැත <input type="checkbox"/> |    |

**03 බෝ නොවන රෝග පිලිබද දැනුම**

පහත සඳහන් ප්‍රතිචාර වලට නිවැරදි ප්‍රතිචාර ඉදිරියෙන් ලකුණුද වැරදි ප්‍රතිචාර සඳහා නැත කොටුව ලකුණුද නොදැනි නම් නොදැනි කොටුව ලකුණුද යොදන්න. (එක් පිලිතුරකට වඩා සටහන් කලහැක)

|                                                                                |                                        |                          |                          | බව / නත / නොදැනි         |      |
|--------------------------------------------------------------------------------|----------------------------------------|--------------------------|--------------------------|--------------------------|------|
| 38. පහත සඳහන් රෝග අතරින් <b>බෝ නොවන</b> රෝග ලෙස සැලකිය හැක්කේ කවර රෝගය/රෝගය ද? | 1. දියවැඩියාව                          | <input type="checkbox"/> | <input type="checkbox"/> | <input type="checkbox"/> | N1 a |
|                                                                                | 2. හෘද ආබාධ                            | <input type="checkbox"/> | <input type="checkbox"/> | <input type="checkbox"/> | N1 b |
|                                                                                | 3. අංශුභාගය                            | <input type="checkbox"/> | <input type="checkbox"/> | <input type="checkbox"/> | N1 c |
|                                                                                | 4. ශ්වසන පද්ධතියේ නිදන් ගත රෝග         | <input type="checkbox"/> | <input type="checkbox"/> | <input type="checkbox"/> | N1 d |
|                                                                                | 5. ක්ෂය රෝගය                           | <input type="checkbox"/> | <input type="checkbox"/> | <input type="checkbox"/> | N1 e |
|                                                                                | 6. පිලිකාව                             | <input type="checkbox"/> | <input type="checkbox"/> | <input type="checkbox"/> | N1 f |
| 39. පහත සඳහන් කවරක් <b>බෝ නොවන</b> රෝග සඳහා හේතු සාධක වන්නේද?                  | 1. දුම්බීම                             | <input type="checkbox"/> | <input type="checkbox"/> | <input type="checkbox"/> | N2 a |
|                                                                                | 2. අධික ලෙස මධ්‍යසාර භාවිතය            | <input type="checkbox"/> | <input type="checkbox"/> | <input type="checkbox"/> | N2 b |
|                                                                                | 3. අභිතකර ආහාර පුරුදු                  | <input type="checkbox"/> | <input type="checkbox"/> | <input type="checkbox"/> | N2 c |
|                                                                                | 4. ශරීරික ව්‍යායාම නොමැතිකම            | <input type="checkbox"/> | <input type="checkbox"/> | <input type="checkbox"/> | N2 d |
|                                                                                | 5. උණු කර නිවැරදි ප්‍රදාය පානය නොකිරීම | <input type="checkbox"/> | <input type="checkbox"/> | <input type="checkbox"/> | N2 e |

**දියවැඩියාව**

|                                                                 |                               |                          |                          | බව / නත / නොදැනි         |      |
|-----------------------------------------------------------------|-------------------------------|--------------------------|--------------------------|--------------------------|------|
| 40. පහත සඳහන් කවරක් දියවැඩියාව වැළැදීමේ අවධානය වැඩි කරනු ලබයිද? | 1. ශාරීරික ව්‍යායාම නොමැති කම | <input type="checkbox"/> | <input type="checkbox"/> | <input type="checkbox"/> | N3 a |
|                                                                 | 2. මධ්‍යසාර භාවිතය            | <input type="checkbox"/> | <input type="checkbox"/> | <input type="checkbox"/> | N3 a |
|                                                                 | 3. ආරය                        | <input type="checkbox"/> | <input type="checkbox"/> | <input type="checkbox"/> | N3 c |
|                                                                 | 4. අධික භරබාරුව               | <input type="checkbox"/> | <input type="checkbox"/> | <input type="checkbox"/> | N3 d |
|                                                                 | 5. අභිතකර ආහාර පුරුදු         | <input type="checkbox"/> | <input type="checkbox"/> | <input type="checkbox"/> | N3 e |

|                                                                            |                                                                |                                                                                  |      |
|----------------------------------------------------------------------------|----------------------------------------------------------------|----------------------------------------------------------------------------------|------|
| 41. දියවැඩියාවේ රෝග ලක්ෂණ වන්නේ පහත සඳහන් ලක්ෂණ අතරින් කවරක්ද?             | 1. අධික පිපාසය                                                 | <input type="checkbox"/> 1 <input type="checkbox"/> 2 <input type="checkbox"/> 3 | N4 a |
|                                                                            | 2. රාත්‍රී කාලයේදී නිතර නිතර මුත්‍රා කිරීමේ අවශ්‍යතාවය         | <input type="checkbox"/> 1 <input type="checkbox"/> 2 <input type="checkbox"/> 3 | N4 b |
|                                                                            | 3. පෙනීමේ දුර්වලතා                                             | <input type="checkbox"/> 1 <input type="checkbox"/> 2 <input type="checkbox"/> 3 | N4 c |
|                                                                            | 4. තුවාල සුව වීමේ ප්‍රමාදය                                     | <input type="checkbox"/> 1 <input type="checkbox"/> 2 <input type="checkbox"/> 3 | N4 d |
|                                                                            | 5. නිතර නිතර ලෙඩ රෝග වලට භාජනය වීම                             | <input type="checkbox"/> 1 <input type="checkbox"/> 2 <input type="checkbox"/> 3 | N4 e |
|                                                                            | 6. දීර්ඝ කාලීනව පවතින කැස්ස                                    | <input type="checkbox"/> 1 <input type="checkbox"/> 2 <input type="checkbox"/> 3 | N4 f |
|                                                                            | 7. කැස්ස සමග ලේ පිටවීම                                         | <input type="checkbox"/> 1 <input type="checkbox"/> 2 <input type="checkbox"/> 3 | N4 g |
|                                                                            | 8. බර අඩුවීම                                                   | <input type="checkbox"/> 1 <input type="checkbox"/> 2 <input type="checkbox"/> 3 | N4 h |
| 42. දියවැඩියාව මගින් හානි සිදුවන ඉන්ද්‍රියය / ඉන්ද්‍රියයන් වන්නේ           | 1. උස්                                                         | <input type="checkbox"/> 1 <input type="checkbox"/> 2 <input type="checkbox"/> 3 | N5 a |
|                                                                            | 2. වකුගඩු                                                      | <input type="checkbox"/> 1 <input type="checkbox"/> 2 <input type="checkbox"/> 3 | N5 b |
|                                                                            | 3. හෘදය                                                        | <input type="checkbox"/> 1 <input type="checkbox"/> 2 <input type="checkbox"/> 3 | N5 c |
|                                                                            | 4. පර්යන්ත ස්නායු                                              | <input type="checkbox"/> 1 <input type="checkbox"/> 2 <input type="checkbox"/> 3 | N5 d |
|                                                                            | 5. අක්මාව                                                      | <input type="checkbox"/> 1 <input type="checkbox"/> 2 <input type="checkbox"/> 3 | N5 e |
|                                                                            | 6. අග්නන්‍යාසය                                                 | <input type="checkbox"/> 1 <input type="checkbox"/> 2 <input type="checkbox"/> 3 | N5 f |
| 43. දියවැඩියාව වැළඳීමෙන් ඇතිවන අනිටු එල කවරේද?                             | 1. මරණය                                                        | <input type="checkbox"/> 1 <input type="checkbox"/> 2 <input type="checkbox"/> 3 | N6 a |
|                                                                            | 2. ශරීරයේ විවිධ ඉන්ද්‍රියයන්ට හානි පැමිණිවීම                   | <input type="checkbox"/> 1 <input type="checkbox"/> 2 <input type="checkbox"/> 3 | N6 b |
|                                                                            | 3. අතපය හිරිගතිය නිසා කාර්යයන් කරගැනීමේ අපහසුව                 | <input type="checkbox"/> 1 <input type="checkbox"/> 2 <input type="checkbox"/> 3 | N6 c |
|                                                                            | 4. දීර්ඝ කාලීන ප්‍රතිකාර ලබාගතයුතු රෝගියෙකු බවට පත්වීම         | <input type="checkbox"/> 1 <input type="checkbox"/> 2 <input type="checkbox"/> 3 | N6 d |
|                                                                            | 5. අස්ථි විකෘතිවීම නිසා ඇවිදීමේ අපහසුවතාවය                     | <input type="checkbox"/> 1 <input type="checkbox"/> 2 <input type="checkbox"/> 3 | N6 e |
| 44. දියවැඩියාව වැළඳීමෙන් ඇත් විය හැක්කේ කුමන සෞඛ්‍යම පුරුදු පිළිපැදීමෙන්ද? | 1. සම බල ආහාර වේලක් අනුභව කිරීමෙන්                             | <input type="checkbox"/> 1 <input type="checkbox"/> 2 <input type="checkbox"/> 3 | N7 a |
|                                                                            | 2. පිෂ්ඨය බහුල ආහාර වලින් වැළකී සිටීමෙන්                       | <input type="checkbox"/> 1 <input type="checkbox"/> 2 <input type="checkbox"/> 3 | N7 b |
|                                                                            | 3. අධික සීනි භාවිතයෙන් ඇත් වීමෙන්                              | <input type="checkbox"/> 1 <input type="checkbox"/> 2 <input type="checkbox"/> 3 | N7 c |
|                                                                            | 4. උසට සරිලන බරක් පවත්වා ගැනීමෙන්                              | <input type="checkbox"/> 1 <input type="checkbox"/> 2 <input type="checkbox"/> 3 | N7 d |
|                                                                            | 5. මධ්‍යසාර භාවිතය නතර කිරීමෙන්                                | <input type="checkbox"/> 1 <input type="checkbox"/> 2 <input type="checkbox"/> 3 | N7 e |
|                                                                            | 6. අධික ලුණු සහිත ආහාර සීමා කිරීම                              | <input type="checkbox"/> 1 <input type="checkbox"/> 2 <input type="checkbox"/> 3 | N7 f |
|                                                                            | 7. දියවැඩියාව සඳහා ලබාගන්නා ප්‍රතිකාර නිසිඅයුරින් පිළිපැදීමෙන් | <input type="checkbox"/> 1 <input type="checkbox"/> 2 <input type="checkbox"/> 3 | N7 g |

**අධි රුධිර පීඩනය** බව / නත / නොහි

|                                                               |                            |                                                                                  |      |
|---------------------------------------------------------------|----------------------------|----------------------------------------------------------------------------------|------|
| 45. අධි රුධිර පීඩනය වැළඳීමේ අවධානම වැඩිකරනු ලබන සාධක කවරක්ද ? | 1. ආරය                     | <input type="checkbox"/> 1 <input type="checkbox"/> 2 <input type="checkbox"/> 3 | N8 a |
|                                                               | 2. අධික තරබාරුව            | <input type="checkbox"/> 1 <input type="checkbox"/> 2 <input type="checkbox"/> 3 | N8 b |
|                                                               | 3. අධික මත්පැන් භාවිතය     | <input type="checkbox"/> 1 <input type="checkbox"/> 2 <input type="checkbox"/> 3 | N8 c |
|                                                               | 4. අධික ලුණු භාවිතය        | <input type="checkbox"/> 1 <input type="checkbox"/> 2 <input type="checkbox"/> 3 | N8 d |
|                                                               | 5. සමහර ඖෂධ භාවිතය         | <input type="checkbox"/> 1 <input type="checkbox"/> 2 <input type="checkbox"/> 3 | N8 e |
|                                                               | 6. ඉහත සඳහන් කිසිවක් නොමැත | <input type="checkbox"/> 1 <input type="checkbox"/> 2 <input type="checkbox"/> 3 | N8 f |

| බේ / නක / නොනී                                                                                                   |                                                                   |                                                                                  |       |
|------------------------------------------------------------------------------------------------------------------|-------------------------------------------------------------------|----------------------------------------------------------------------------------|-------|
| 46. අධි රුධිර පීඩනය වැළඳී ඇති රෝගියෙකුගේ නිබිය හැකි රෝග ලක්ෂණ මේවා අතරින් කවරක්ද? (එක පිලිතුරකට වඩා සඳහන් කලහැක) | 1. කිසිදු රෝග ලක්ෂණයක් නොමැත                                      | <input type="checkbox"/> 1 <input type="checkbox"/> 2 <input type="checkbox"/> 3 | N9 a  |
|                                                                                                                  | 2. අධික හිසරදය                                                    | <input type="checkbox"/> 1 <input type="checkbox"/> 2 <input type="checkbox"/> 3 | N9 b  |
|                                                                                                                  | 3. කරකැවිල්ල                                                      | <input type="checkbox"/> 1 <input type="checkbox"/> 2 <input type="checkbox"/> 3 | N9 c  |
|                                                                                                                  | 4. පෙනීමේ දුර්වලතා                                                | <input type="checkbox"/> 1 <input type="checkbox"/> 2 <input type="checkbox"/> 3 | N9 d  |
|                                                                                                                  | 5. ඔක්කාරය/ වමනය                                                  | <input type="checkbox"/> 1 <input type="checkbox"/> 2 <input type="checkbox"/> 3 | N9 e  |
|                                                                                                                  | 6. තුවාල සුව වීමට කල් ගත වීම                                      | <input type="checkbox"/> 1 <input type="checkbox"/> 2 <input type="checkbox"/> 3 | N9 f  |
| 47. අධි රුධිර පීඩනයට ප්‍රතිකාර ලබා නොගැනීම නිසා එමගින් හානි සිදුවන ඉන්ද්‍රියන් වනුයේ?                            | 1. වකුගඩු                                                         | <input type="checkbox"/> 1 <input type="checkbox"/> 2 <input type="checkbox"/> 3 | N10 a |
|                                                                                                                  | 2. හෘදය                                                           | <input type="checkbox"/> 1 <input type="checkbox"/> 2 <input type="checkbox"/> 3 | N10 c |
|                                                                                                                  | 3. මොළය                                                           | <input type="checkbox"/> 1 <input type="checkbox"/> 2 <input type="checkbox"/> 3 | N10 d |
|                                                                                                                  | 4. අක්මාව                                                         | <input type="checkbox"/> 1 <input type="checkbox"/> 2 <input type="checkbox"/> 3 | N10 e |
|                                                                                                                  | 5. ආමාශය                                                          | <input type="checkbox"/> 1 <input type="checkbox"/> 2 <input type="checkbox"/> 3 | N10 f |
| 48. අධි රුධිර පීඩනය වැළඳීම වලක්වා ගත හැකි ක්‍රම වන්නේ?                                                           | 1. සිරුරේ බර පාලනය                                                | <input type="checkbox"/> 1 <input type="checkbox"/> 2 <input type="checkbox"/> 3 | N11 a |
|                                                                                                                  | 2. එන්නත් දීම මගින්                                               | <input type="checkbox"/> 1 <input type="checkbox"/> 2 <input type="checkbox"/> 3 | N11 b |
|                                                                                                                  | 3. මධ්‍යසාර භාවිතයෙන් වැළකී සිටීම                                 | <input type="checkbox"/> 1 <input type="checkbox"/> 2 <input type="checkbox"/> 3 | N11 c |
|                                                                                                                  | 4. ලුණු භාවිතය සීමා කිරීම                                         | <input type="checkbox"/> 1 <input type="checkbox"/> 2 <input type="checkbox"/> 3 | N11 d |
|                                                                                                                  | 5. දිනපතා ශාරීරික ව්‍යායාම වල යෙදීම                               | <input type="checkbox"/> 1 <input type="checkbox"/> 2 <input type="checkbox"/> 3 | N11 e |
|                                                                                                                  | 6. මානසික ආතතිය දුරු කිරීම                                        | <input type="checkbox"/> 1 <input type="checkbox"/> 2 <input type="checkbox"/> 3 | N11 g |
|                                                                                                                  | 7. දියවැඩියාව / කොලෙස්ටරෝල් වැනි රෝගයන්ට ප්‍රතිකාර ලබාගැනීම මගින් | <input type="checkbox"/> 1 <input type="checkbox"/> 2 <input type="checkbox"/> 3 | N11 h |

|                 |                |
|-----------------|----------------|
| <b>හෘදයාබාද</b> | බේ / නක / නොනී |
|-----------------|----------------|

|                                                                 |                                                                                                                                 |                                                                                  |       |
|-----------------------------------------------------------------|---------------------------------------------------------------------------------------------------------------------------------|----------------------------------------------------------------------------------|-------|
| 49. හෘදආබාධයක් යනු කුමක්ද?                                      | 1. ඔක්සිජන් හා පෝෂ්‍ය ද්‍රව්‍ය සැපයුම අඩුවී රුධිර සැපයුම අඩාල වී (නාල කුඩා වී / අවහිර වීම නිසා) හෘදපේශයට සදාකාලිකව හානි සිදුවීම | <input type="checkbox"/> 1 <input type="checkbox"/> 2 <input type="checkbox"/> 3 | N12 a |
|                                                                 | 2. පර්ශු කුඩුවට හානි සිදුවීම                                                                                                    | <input type="checkbox"/> 1 <input type="checkbox"/> 2 <input type="checkbox"/> 3 | N12 b |
|                                                                 | 3. හුස්මගැනීමේ වේගය වැඩිවීම                                                                                                     | <input type="checkbox"/> 1 <input type="checkbox"/> 2 <input type="checkbox"/> 3 | N12 c |
|                                                                 | 4. හෘද ස්පන්දන වේගය වැඩිවීම                                                                                                     | <input type="checkbox"/> 1 <input type="checkbox"/> 2 <input type="checkbox"/> 3 | N12 d |
| 50. හෘදයාබාධයක් හඳුනා ගැනීමේ රෝග ලක්ෂණ කවරේද?                   | 1. විවේකීව සිටීමේදී හට ගන්නා පපුවේ වේදනාව                                                                                       | <input type="checkbox"/> 1 <input type="checkbox"/> 2 <input type="checkbox"/> 3 | N13 a |
|                                                                 | 2. වම් අත දිගේ හා බෙල්ලේ වම් පැත්තේ පැතිර යන පපුවේ වේදනාව                                                                       | <input type="checkbox"/> 1 <input type="checkbox"/> 2 <input type="checkbox"/> 3 | N13 b |
|                                                                 | 3. පපුවේ වේදනාව සමග අධික දහඩිය දැමීම හා වමනය                                                                                    | <input type="checkbox"/> 1 <input type="checkbox"/> 2 <input type="checkbox"/> 3 | N13 c |
|                                                                 | 4. පපුවේ වේදනාව සමග හුස්ම ගැනීමේ අපහසුතාවය                                                                                      | <input type="checkbox"/> 1 <input type="checkbox"/> 2 <input type="checkbox"/> 3 | N13 d |
| 51. පහත සඳහන් කවරක් හෘදයාබාධ සෑදීමේ අවධානම වැඩි කිරීමට හේතුවේද? | 1. රුධිරයේ කොලෙස්ටරෝල් වැඩිවීම                                                                                                  | <input type="checkbox"/> 1 <input type="checkbox"/> 2 <input type="checkbox"/> 3 | N14 a |
|                                                                 | 2. දුම්පානය                                                                                                                     | <input type="checkbox"/> 1 <input type="checkbox"/> 2 <input type="checkbox"/> 3 | N14 b |
|                                                                 | 3. දියවැඩියාව                                                                                                                   | <input type="checkbox"/> 1 <input type="checkbox"/> 2 <input type="checkbox"/> 3 | N14 c |
|                                                                 | 4. අධික භරබාරුව                                                                                                                 | <input type="checkbox"/> 1 <input type="checkbox"/> 2 <input type="checkbox"/> 3 | N14 d |
|                                                                 | 5. අධි රුධිර පීඩනය                                                                                                              | <input type="checkbox"/> 1 <input type="checkbox"/> 2 <input type="checkbox"/> 3 | N14 e |



|                                                                                     |                                           |                                                                                  |       |
|-------------------------------------------------------------------------------------|-------------------------------------------|----------------------------------------------------------------------------------|-------|
| 51. හඳුයාබාධ වැලදීමෙන් සිදුවන අතුරු ආබාධ කවරේද?                                     | 1. මරණය                                   | <input type="checkbox"/> 1 <input type="checkbox"/> 2 <input type="checkbox"/> 3 | N15 a |
|                                                                                     | 2. එදිනෙදා වැඩ කටයුතු කර ගැනීමේ අපහසුතාවය | <input type="checkbox"/> 1 <input type="checkbox"/> 2 <input type="checkbox"/> 3 | N15 b |
|                                                                                     | 3. නැවත හඳුයාබාධයක් වැළදීමේ අවදානම        | <input type="checkbox"/> 1 <input type="checkbox"/> 2 <input type="checkbox"/> 3 | N15 c |
|                                                                                     | 4. අතුරු ආබාධ කිසිවක් නැත                 | <input type="checkbox"/> 1 <input type="checkbox"/> 2 <input type="checkbox"/> 3 | N15 d |
| 52. ඔබට හඳුයාබාධ සෑදීමෙන් වැලකී සිටීමට පිලිපැදිය යුතු වන්නේ කවර උපදෙස් / උපදෙසක් ද? | 1. අධික මේද සහිත ආහාර වලින් වැලකී සිටීම   | <input type="checkbox"/> 1 <input type="checkbox"/> 2 <input type="checkbox"/> 3 | N16 a |
|                                                                                     | 2. නිතිපතා ශාරීරික ව්‍යායාම වල යෙදීම      | <input type="checkbox"/> 1 <input type="checkbox"/> 2 <input type="checkbox"/> 3 | N16 b |
|                                                                                     | 3. දුම්පානය නතර කිරීම                     | <input type="checkbox"/> 1 <input type="checkbox"/> 2 <input type="checkbox"/> 3 | N16 c |
|                                                                                     | 4. ශරීරය උසට සරිලන බරකින් යුතුව තබාගැනීම  | <input type="checkbox"/> 1 <input type="checkbox"/> 2 <input type="checkbox"/> 3 | N16 d |
|                                                                                     | 5. කෑමට පෙර අත සබන් දමා යෙදීමෙන්          | <input type="checkbox"/> 1 <input type="checkbox"/> 2 <input type="checkbox"/> 3 | N16 e |
|                                                                                     | 6. සමබල පෝෂ්‍යද්‍රව්‍ය ආහාර වේලක් භාවිතය  | <input type="checkbox"/> 1 <input type="checkbox"/> 2 <input type="checkbox"/> 3 | N16 f |

**අංශභාගය**

|                                                                |                                                                                                             |                                                                                  |       |
|----------------------------------------------------------------|-------------------------------------------------------------------------------------------------------------|----------------------------------------------------------------------------------|-------|
| 53. ආඝාතය (අංශභාගය යනු කුමක්ද)                                 | 1. රුධිර සැපයුම බාධාවක් නිසා මොළයට ඔක්සිජන් හා පෝෂන ද්‍රව්‍ය සැපයීමේ උගතතාවය නිසා මොළයේ සෛලවලට හානි සිදුවීම | <input type="checkbox"/> 1 <input type="checkbox"/> 2 <input type="checkbox"/> 3 | N17 a |
|                                                                | 2. සුෂ්‍රුමිනාවට හානි සිදුවීම නිසා ඇතිවන රෝගී තත්ත්වයකි                                                     | <input type="checkbox"/> 1 <input type="checkbox"/> 2 <input type="checkbox"/> 3 | N17 b |
|                                                                | 3. හිස් කබල තුවාල වීම                                                                                       | <input type="checkbox"/> 1 <input type="checkbox"/> 2 <input type="checkbox"/> 3 | N17 c |
| 53. අංශභාගය හඳුනා ගැනීමේ රෝග ලක්ෂණ කවරේද?                      | I. එකවර ඇතිවූ ගොත ගැසීම                                                                                     | <input type="checkbox"/> 1 <input type="checkbox"/> 2 <input type="checkbox"/> 3 | N18 a |
|                                                                | 2. හදිසියේ ඇතිවූ ශරීරයේ එක් අංශයක අප්‍රාණික බව                                                              | <input type="checkbox"/> 1 <input type="checkbox"/> 2 <input type="checkbox"/> 3 | N18 b |
|                                                                | 3. හදිසියේ ඇතිවූ ශරීරයේ එක් අංශයක හැගීම් දැනීම් නොමැති වීම                                                  | <input type="checkbox"/> 1 <input type="checkbox"/> 2 <input type="checkbox"/> 3 | N18 c |
|                                                                | 4. පෙනීමේ විභේදන                                                                                            | <input type="checkbox"/> 1 <input type="checkbox"/> 2 <input type="checkbox"/> 3 | N18 d |
| 54. පහත සඳහන් කවරක් අංශභාගය සෑදීමේ අවදානම වැඩි කිරීමට හේතුවේද? | 1. රුධිරයේ කොලොස්ටරෝල් වැඩිවීම                                                                              | <input type="checkbox"/> 1 <input type="checkbox"/> 2 <input type="checkbox"/> 3 | N19a  |
|                                                                | 2. දුම්පානය                                                                                                 | <input type="checkbox"/> 1 <input type="checkbox"/> 2 <input type="checkbox"/> 3 | N19b  |
|                                                                | 3. දියවැඩියාව                                                                                               | <input type="checkbox"/> 1 <input type="checkbox"/> 2 <input type="checkbox"/> 3 | N19c  |
|                                                                | 4. අධික තරබාරුව                                                                                             | <input type="checkbox"/> 1 <input type="checkbox"/> 2 <input type="checkbox"/> 3 | N19d  |
|                                                                | 5. අධි රුධිර පීඩනය                                                                                          | <input type="checkbox"/> 1 <input type="checkbox"/> 2 <input type="checkbox"/> 3 | N19e  |
| 55. අංශභාගය (ආඝාතය) සෑදීමෙන් ඇතිවන අතුරු එල කවරෙක්ද?           | 1. මරණය                                                                                                     | <input type="checkbox"/> 1 <input type="checkbox"/> 2 <input type="checkbox"/> 3 | N20a  |
|                                                                | 2. ශරීරයේ අංශයක අප්‍රාණික බව                                                                                | <input type="checkbox"/> 1 <input type="checkbox"/> 2 <input type="checkbox"/> 3 | N20b  |
|                                                                | 3. කට්තයේ අපහසුතා                                                                                           | <input type="checkbox"/> 1 <input type="checkbox"/> 2 <input type="checkbox"/> 3 | N20c  |
|                                                                | 4. එදිනෙදා කාර්ය කර ගැනීමේ අපහසුතාවය                                                                        | <input type="checkbox"/> 1 <input type="checkbox"/> 2 <input type="checkbox"/> 3 | N20d  |
|                                                                | 5. අතුරු ආබාධ කිසිවක් නැත                                                                                   | <input type="checkbox"/> 1 <input type="checkbox"/> 2 <input type="checkbox"/> 3 | N20e  |

|                                                                    |                                         | බේ / නත / නොහි |   |   |       |
|--------------------------------------------------------------------|-----------------------------------------|----------------|---|---|-------|
| 56. ඔබ ආඝාතය සෑදීමේ අවධානමෙන් වැලකීමට පිලිපැදිය යුතු උපදෙස් කවරේද? | 1. අධික මේද සහිත ආහාර වලින් වැලකී සිටීම | 1              | 2 | 3 | N21 a |
|                                                                    | 2. නිතිපතා ශාරීරික ව්‍යායාම වල යෙදීම    | 1              | 2 | 3 | N21 b |
|                                                                    | 3. දුම්පානය නතර කිරීම                   | 1              | 2 | 3 | N21 c |
|                                                                    | 4. ශරීරය උසට සරලන බරකින් යුතුව තබාගැනීම | 1              | 2 | 3 | N21 d |
|                                                                    | 5. කැමට පෙර අත සබන් දමා යෙදීමෙන්        | 1              | 2 | 3 | N21 e |
|                                                                    | 6. සමබල පෝෂ්‍යදායී ආහාර වේලක් භාවිතය    | 1              | 2 | 3 | N21 f |

**පිළිකාව** බේ / නත / නොහි

|                                                              |                                                                          |                                |   |   |       |
|--------------------------------------------------------------|--------------------------------------------------------------------------|--------------------------------|---|---|-------|
| 57. පිළිකාවක් හඳුනා ගැනීමේදී පලමු අනතුරු හැඟවීමේ සංඥා වන්නේ? | 1. ශරීරයේ මොනයම් හෝ ස්ථානයක වේදනාවක් රහිත ගැටිත්තක් තිබීම                | 1                              | 2 | 3 | N22 a |
|                                                              | 2. දීර්ඝ කාලීනව සුව නොවන තුවාලයක්                                        | 1                              | 2 | 3 | N22 b |
|                                                              | 3. දීර්ඝ කාලීනව පවතින සුව නොවන කැස්සක්                                   | 1                              | 2 | 3 | N22 c |
|                                                              | 4. මල සමග ලේ සිඳුම් පිටවීම                                               | 1                              | 2 | 3 | N22 d |
|                                                              | 5. ගිලීමේ අපහසුතාවයක්                                                    | 1                              | 2 | 3 | N22 e |
|                                                              | 6. හේතුවක් රහිතව ශරීරයේ බර අඩු වීම                                       | 1                              | 2 | 3 | N22 f |
|                                                              | 7. වැසිකිලියාමේ වෙනසක්                                                   | 1                              | 2 | 3 | N22 g |
|                                                              | 8. කට හඬී සිදුවන වෙනසක්                                                  | 1                              | 2 | 3 | N22 i |
|                                                              | 9. වේදනා සහිත ගැටිත්තක් හෝ ගෙඩියක්                                       | 1                              | 2 | 3 | N22 j |
|                                                              | 10. කැස්ස සමග රුධිරය පිටවීම                                              | 1                              | 2 | 3 | N22 k |
|                                                              | 57. ඔබ පිළිකාව යන රෝගී තත්ත්වය පිළිබඳ දැනුවත්ව තිබිය යුත්තේ ඇයි?         | 1. එය මරණය ලගාකරවන රෝගයක් නිසා | 1 | 2 | 3     |
| 2. එය වැලඳුනහොත් එදිනෙදා කාර්යයන් කිරීමට අපහසුවන නිසා        |                                                                          | 1                              | 2 | 3 | N23 b |
| 3. එය වැලඳුනහොත් දීර්ඝකාලීන ප්‍රතිකාර ලබාගැනීමට සිදුවන නිසා  |                                                                          | 1                              | 2 | 3 | N23 c |
| 4. එය 100 % සුවකල හැකි රෝගී තත්ත්වයක් නිසා                   |                                                                          | 1                              | 2 | 3 | N23 d |
| 5. අධික ලෙස උක්පිඩා වීදීමට සිදුවීම නිසා                      |                                                                          | 1                              | 2 | 3 | N23 e |
| 58. බොහෝ පිළිකා සෑදීමට හේතු සාධකය /සාධක වන්නේ මෙයින් කවරේද?  | 1. දුම්බීම                                                               | 1                              | 2 | 3 | N24 a |
|                                                              | 2. දුම්කොළ හා පුවක් සමග හුලන් වීට කැම                                    | 1                              | 2 | 3 | N24 b |
|                                                              | 3. ආහාර වලට යොදන විවිධ රසකාරක කල් තබා ගැනීමේ දවස ආදිය                    | 1                              | 2 | 3 | N24 c |
|                                                              | 4. පිලිස්සු මස් / මාළු (BBQ) වැනි ආහාර නිතර ගැනීම                        | 1                              | 2 | 3 | N24 d |
|                                                              | 5. දීර්ඝ කාලීනව පාරජම්බුල කිරණ වල (හිරු එළියට) නිරාවරණය                  | 1                              | 2 | 3 | N24 e |
|                                                              | 6. අධික තරබාරුව                                                          | 1                              | 2 | 3 | N24 d |
|                                                              | 7. බහු පුරුෂ සේවනය                                                       | 1                              | 2 | 3 | N24 e |
|                                                              | 8. කාබෝහයිඩ්‍රේට් අධික, මේද අධික හා ප්‍රෝටීන ප්‍රමාණයෙන් අවම ආහාර අනුභවය | 1                              | 2 | 3 | N24 f |
|                                                              | 9. පළතුරු හා එළවළු පරිභෝජනයේ මදකම                                        | 1                              | 2 | 3 | N24 g |

|                                                                                                  |                                                      |                                                                                  |       |
|--------------------------------------------------------------------------------------------------|------------------------------------------------------|----------------------------------------------------------------------------------|-------|
| 59. පිළිකාවක් සෑදීමේ අවධානම අඩු කර ගැනීමට පිළිපැදිය හැකි මාර්ග වන්නේ ?                           | 1. දුම්බීමෙන් නැවැත්වීම                              | <input type="checkbox"/> 1 <input type="checkbox"/> 2 <input type="checkbox"/> 3 | N25 a |
|                                                                                                  | 2. බුලත්ච්චි කෑම නැවැත්වීම                           | <input type="checkbox"/> 1 <input type="checkbox"/> 2 <input type="checkbox"/> 3 | N25 b |
|                                                                                                  | 3. එලවළු හා පළතුරු බහුලව අනුභවය කිරීම                | <input type="checkbox"/> 1 <input type="checkbox"/> 2 <input type="checkbox"/> 3 | N25 c |
|                                                                                                  | 5. ස්වභාවික ආහාර හැකි සෑමවිටම පරිභෝජනය               | <input type="checkbox"/> 1 <input type="checkbox"/> 2 <input type="checkbox"/> 3 | N25 d |
|                                                                                                  | 5. නිතිපතා ව්‍යායාමවල යෙදීම                          | <input type="checkbox"/> 1 <input type="checkbox"/> 2 <input type="checkbox"/> 3 | N25 e |
|                                                                                                  | 6. දීර්ගකාලීනව හිරු එළියට නිරාවරනය/ බදුන් නොවීම      | <input type="checkbox"/> 1 <input type="checkbox"/> 2 <input type="checkbox"/> 3 | N25 f |
|                                                                                                  | 7. එක් ලිංගික සහකරුවෙකු / සහකාරියක් පමණක් තෝරා ගැනීම | <input type="checkbox"/> 1 <input type="checkbox"/> 2 <input type="checkbox"/> 3 | N25 g |
| 60. බෝ නොවන රෝග පිළිබඳ දැනුම සහ ඒවායේ ප්‍රාථමික සංරක්ෂණ ක්‍රම පිළිබඳ දැනුම අපට වැදගත් වන්නේ ඇයි? | 1. බෝ නොවන රෝග වැලදීමෙන් ආරක්ෂා වීමට                 | <input type="checkbox"/> 1 <input type="checkbox"/> 2 <input type="checkbox"/> 3 | N26 a |
|                                                                                                  | 2. බෝ නොවන රෝග වැලදී ඇත්නම් රෝගය පාලනය කිරීමට        | <input type="checkbox"/> 1 <input type="checkbox"/> 2 <input type="checkbox"/> 3 | N26 b |
|                                                                                                  | 3. පවුලේ සාමාජිකයන් බෝ නොවන රෝග වලින් ආරක්ෂා කිරීමට  | <input type="checkbox"/> 1 <input type="checkbox"/> 2 <input type="checkbox"/> 3 | N26 c |

**04 පෝෂණය සම්බන්ධ දැනුම**

|                                                                              |                                                                                   |                                                                                  |      |
|------------------------------------------------------------------------------|-----------------------------------------------------------------------------------|----------------------------------------------------------------------------------|------|
| 61. සමබල ආහාර වේලක අඩංගු ආහාර සංඝටක කවරේද?                                   | 1. පිෂ්ඨය                                                                         | <input type="checkbox"/> 1 <input type="checkbox"/> 2 <input type="checkbox"/> 3 | K1 a |
|                                                                              | 2. ප්‍රෝටීන                                                                       | <input type="checkbox"/> 1 <input type="checkbox"/> 2 <input type="checkbox"/> 3 | K1 b |
|                                                                              | 3. මේදය                                                                           | <input type="checkbox"/> 1 <input type="checkbox"/> 2 <input type="checkbox"/> 3 | K1 c |
|                                                                              | 4. විටමින්                                                                        | <input type="checkbox"/> 1 <input type="checkbox"/> 2 <input type="checkbox"/> 3 | K1 d |
|                                                                              | 5. බනීපලවණ                                                                        | <input type="checkbox"/> 1 <input type="checkbox"/> 2 <input type="checkbox"/> 3 | K1 e |
| 62. ඔබගේ ආහාර වේල පෝෂ්‍යජනක කර ගැනීමට ඔබ අනුගමනය කර හැකි ක්‍රියා මාර්ග වන්නේ | 1. දිනපතා ආහාර වේල සඳහා එලවළු පළතුරු එකතු කර ගැනීම                                | <input type="checkbox"/> 1 <input type="checkbox"/> 2 <input type="checkbox"/> 3 | K2 a |
|                                                                              | 2. ලුණු අධික ආහාර ගැනීමෙන් වැලකී සිටීම<br>උදා-පීට්සා චීස්-අල බැදුම්(French fries) | <input type="checkbox"/> 1 <input type="checkbox"/> 2 <input type="checkbox"/> 3 | K2 b |
|                                                                              | 3. තන්තු සහිත ආහාර වැඩි වශයෙන් අනුභවය කිරීම<br>උදා-පළතුරුල එළවළු                  | <input type="checkbox"/> 1 <input type="checkbox"/> 2 <input type="checkbox"/> 3 | K2 c |
|                                                                              | 4. ඔමේගා- 3 බහුල කුඩා මාළු නිතර ආහාරයට එක් කර ගැනීම<br>උදා - සැමන්                | <input type="checkbox"/> 1 <input type="checkbox"/> 2 <input type="checkbox"/> 3 | K2 d |
|                                                                              | 5. මේද අධික ආහාර සීමා කිරීම                                                       | <input type="checkbox"/> 1 <input type="checkbox"/> 2 <input type="checkbox"/> 3 | K2 e |
|                                                                              | 6. ආහාර වේල ගැනීම අතපසු කිරීම (diet)                                              | <input type="checkbox"/> 1 <input type="checkbox"/> 2 <input type="checkbox"/> 3 | K2 f |
| 63. පහත සඳහන් ආහාර අතරින් ප්‍රෝටීන් බහුල ආහාර වනුයේ කවරක්ද?                  | 1. මාළු උදා කුඩා මාළු, කෙලවල්ලා                                                   | <input type="checkbox"/> 1 <input type="checkbox"/> 2 <input type="checkbox"/> 3 | K3 a |
|                                                                              | 2. මස් වර්ග                                                                       | <input type="checkbox"/> 1 <input type="checkbox"/> 2 <input type="checkbox"/> 3 | K3 b |
|                                                                              | 3. බිත්තර සුදු මදය                                                                | <input type="checkbox"/> 1 <input type="checkbox"/> 2 <input type="checkbox"/> 3 | K3 c |
|                                                                              | 4. ධාන්‍ය හා පියලි වර්ග වල                                                        | <input type="checkbox"/> 1 <input type="checkbox"/> 2 <input type="checkbox"/> 3 | K3 d |
|                                                                              | 5. පලතුරු හා පලා වර්ග වල                                                          | <input type="checkbox"/> 1 <input type="checkbox"/> 2 <input type="checkbox"/> 3 | K3 e |
| 64. පහත සඳහන් ආහාර වර්ග වලින් පිෂ්ඨය බහුල ආහාර වර්ග කවරේද?                   | 1. බත්, හාල්පිටි යොදා පිසූ ආහාර                                                   | <input type="checkbox"/> 1 <input type="checkbox"/> 2 <input type="checkbox"/> 3 | K4 a |
|                                                                              | 2. අල, බතල වැනි අල වර්ග                                                           | <input type="checkbox"/> 1 <input type="checkbox"/> 2 <input type="checkbox"/> 3 | K4 b |
|                                                                              | 3. කෝස් දෙල්                                                                      | <input type="checkbox"/> 1 <input type="checkbox"/> 2 <input type="checkbox"/> 3 | K4 c |
|                                                                              | 5. කිරිවලින් තැනූ ආහාර උදා: යෝගට්, චීස්,                                          | <input type="checkbox"/> 1 <input type="checkbox"/> 2 <input type="checkbox"/> 3 | K4 d |
|                                                                              | 5. චොකලට්                                                                         | <input type="checkbox"/> 1 <input type="checkbox"/> 2 <input type="checkbox"/> 3 | K4 e |

|                                                                                                                                                    |                                                                   |                                                                                  |      |
|----------------------------------------------------------------------------------------------------------------------------------------------------|-------------------------------------------------------------------|----------------------------------------------------------------------------------|------|
| 65. සෞඛ්‍ය අහිතකාර (Junk food, fast food) අධි කැලරි ප්‍රමාණයකින් යුක්ත නමුත් එවැනි පෝෂණ ගුණය ඉතා අඩුය. පහත සඳහන් අහිතකාර අහිතකාර ආහාර වන්නේ කවරකද? | 1. අල බැඳුම් (Potato chip)                                        | <input type="checkbox"/> 1 <input type="checkbox"/> 2 <input type="checkbox"/> 3 | K5 a |
|                                                                                                                                                    | 2. ටොෆි                                                           | <input type="checkbox"/> 1 <input type="checkbox"/> 2 <input type="checkbox"/> 3 | K5 b |
|                                                                                                                                                    | 3. චුච්චුම් (chewing gum)                                         | <input type="checkbox"/> 1 <input type="checkbox"/> 2 <input type="checkbox"/> 3 | K5 c |
|                                                                                                                                                    | 4. බර්ගර් වැනි ආහාර (burgers)                                     | <input type="checkbox"/> 1 <input type="checkbox"/> 2 <input type="checkbox"/> 3 | K5 d |
|                                                                                                                                                    | 5. පීට්සා (Pizza)                                                 | <input type="checkbox"/> 1 <input type="checkbox"/> 2 <input type="checkbox"/> 3 | K5 e |
|                                                                                                                                                    | 6. පලතුරු වර්ග.                                                   | <input type="checkbox"/> 1 <input type="checkbox"/> 2 <input type="checkbox"/> 3 | K5 f |
| 66. සෞඛ්‍ය අහිතකාර නිතර ගැනීමෙන් සිදුවන අහිතකර ප්‍රතිඵල කවරකද?                                                                                     | 1. දියවැඩියාව සෑදීමේ ප්‍රවණතාව වැඩිවීම                            | <input type="checkbox"/> 1 <input type="checkbox"/> 2 <input type="checkbox"/> 3 | K6 a |
|                                                                                                                                                    | 2. අධික තරබාරුව                                                   | <input type="checkbox"/> 1 <input type="checkbox"/> 2 <input type="checkbox"/> 3 | K6 b |
|                                                                                                                                                    | 3. දත් දිරායාම                                                    | <input type="checkbox"/> 1 <input type="checkbox"/> 2 <input type="checkbox"/> 3 | K6 c |
|                                                                                                                                                    | 4. හෘද රෝග සෑදීමේ අවදානම වැඩිවීම                                  | <input type="checkbox"/> 1 <input type="checkbox"/> 2 <input type="checkbox"/> 3 | K6 d |
| 67. පලතුරු සහ එලවළු අනුභවය වැදගත් වන්නේ ඇයි?                                                                                                       | 1. පලතුරු සහ එලවළු විටමින් සහ බනිප්‍රවණ වලින් පොහොසත් නිසා        | <input type="checkbox"/> 1 <input type="checkbox"/> 2 <input type="checkbox"/> 3 | K7 a |
|                                                                                                                                                    | 2. තන්තු ප්‍රභවයක් බැවින්                                         | <input type="checkbox"/> 1 <input type="checkbox"/> 2 <input type="checkbox"/> 3 | K7 b |
|                                                                                                                                                    | 3. සමහර එලවළු ප්‍රෝටීන ප්‍රභවයක් නිසා                             | <input type="checkbox"/> 1 <input type="checkbox"/> 2 <input type="checkbox"/> 3 | K7 c |
|                                                                                                                                                    | 4. තරබාරු අඩු කිරීමට සමත් නිසා                                    | <input type="checkbox"/> 1 <input type="checkbox"/> 2 <input type="checkbox"/> 3 | K7 d |
|                                                                                                                                                    | 5. දියවැඩියාව, අධිරුධිර පීඩනය, හෘදයාබාධ සෑදීමේ අවදානම අඩුකරන නිසා | <input type="checkbox"/> 1 <input type="checkbox"/> 2 <input type="checkbox"/> 3 | K7 e |
|                                                                                                                                                    | 6. පිලිකා සෑදීමේ අවදානම අඩු කරන නිසා                              | <input type="checkbox"/> 1 <input type="checkbox"/> 2 <input type="checkbox"/> 3 | K7 f |

**05 ශාරීරික ව්‍යායාම පිළිබඳ දැනුම**

|                                                                              |                                                             |                                                                                  |      |
|------------------------------------------------------------------------------|-------------------------------------------------------------|----------------------------------------------------------------------------------|------|
| 68. අධික තරබාරුව ඔබගේ ශරීර සෞඛ්‍යයට බලපාන්නේ කෙසේද?                          | 1. එය දියවැඩියාව සෑදීමේ ප්‍රවණතාවය වැඩි කරයි                | <input type="checkbox"/> 1 <input type="checkbox"/> 2 <input type="checkbox"/> 3 | K8 a |
|                                                                              | 2. එය අධිරුධිර පීඩනය සෑදීමේ ප්‍රවණතාවය වැඩි කරයි            | <input type="checkbox"/> 1 <input type="checkbox"/> 2 <input type="checkbox"/> 3 | K8 b |
|                                                                              | 3. එය හෘද ආබාධ/ අංශ භාගය සෑදීමේ ප්‍රවණතාවය වැඩි කරයි        | <input type="checkbox"/> 1 <input type="checkbox"/> 2 <input type="checkbox"/> 3 | K8 c |
|                                                                              | 4. එය සන්දි ආබාධ උදා - ආතරයිටිස් සෑදීමේ ප්‍රවණතාව වැඩි කරයි | <input type="checkbox"/> 1 <input type="checkbox"/> 2 <input type="checkbox"/> 3 | K8 d |
| 69. ශාරීරික ව්‍යායාම කිරීමෙන් බෝ නොවන රෝග සෑදීමේ ප්‍රවණතාව අඩු කරන්නේ කෙසේද? | 1. රුධිරයේ සීනි අඩු කිරීමෙන්                                | <input type="checkbox"/> 1 <input type="checkbox"/> 2 <input type="checkbox"/> 3 | K9 a |
|                                                                              | 2. රුධිරයේ රුධිර ලිපිඩ අඩු කිරීම මගින්                      | <input type="checkbox"/> 1 <input type="checkbox"/> 2 <input type="checkbox"/> 3 | K9 b |
|                                                                              | 3. අධි රුධිර පීඩනය ඇත්නම් පීඩනය අඩු කිරීම මගින්             | <input type="checkbox"/> 1 <input type="checkbox"/> 2 <input type="checkbox"/> 3 | K9 c |
|                                                                              | 4. රුධිර සංසරණ පද්ධතියේ මනා ක්‍රියාකාරීත්වය පවත්වා ගැනීමෙන් | <input type="checkbox"/> 1 <input type="checkbox"/> 2 <input type="checkbox"/> 3 | K9 d |
|                                                                              | 5. මානසික ආතතිය වැඩි කිරීම මගින්                            | <input type="checkbox"/> 1 <input type="checkbox"/> 2 <input type="checkbox"/> 3 | K9 e |
|                                                                              | 6. අස්ථි හා මාංශ පේෂීන් සවීමත් කිරීම මගින්                  | <input type="checkbox"/> 1 <input type="checkbox"/> 2 <input type="checkbox"/> 3 | K9 f |
|                                                                              | 7. ශරීරයේ බර අඩු කිරීම මගින්                                | <input type="checkbox"/> 1 <input type="checkbox"/> 2 <input type="checkbox"/> 3 | K9 g |

| දුමපානය                                                                                           |                               | බේ / නක / නොදැනී         |                          |                          |       |
|---------------------------------------------------------------------------------------------------|-------------------------------|--------------------------|--------------------------|--------------------------|-------|
| 70. දුමපානය ශරීරයට අහිතකර වේද දුමපානය මගින් හානි සිදුවිය හැකි ඉන්ද්‍රියන් වන්නේ පහත සඳහන් කවරක්ද? | 1. හෘදය                       | <input type="checkbox"/> | <input type="checkbox"/> | <input type="checkbox"/> | K10 a |
|                                                                                                   | 2. ආමාශය                      | <input type="checkbox"/> | <input type="checkbox"/> | <input type="checkbox"/> | K10 b |
|                                                                                                   | 3. රුධිරවාහිනී                | <input type="checkbox"/> | <input type="checkbox"/> | <input type="checkbox"/> | K10 c |
|                                                                                                   | 4. පෙනහළු                     | <input type="checkbox"/> | <input type="checkbox"/> | <input type="checkbox"/> | K10 d |
|                                                                                                   | 5. අක්මාව                     | <input type="checkbox"/> | <input type="checkbox"/> | <input type="checkbox"/> | K10 e |
| 71. දුමපානය නිසා වැලඳිය හැකි රෝග ආබාධ කවරේද?                                                      | 1. පීළිකා                     | <input type="checkbox"/> | <input type="checkbox"/> | <input type="checkbox"/> | K11 a |
|                                                                                                   | 2. හෘද ආබාධ                   | <input type="checkbox"/> | <input type="checkbox"/> | <input type="checkbox"/> | K11 b |
|                                                                                                   | 3. අංශභාගය                    | <input type="checkbox"/> | <input type="checkbox"/> | <input type="checkbox"/> | K11 c |
|                                                                                                   | 4. ශ්වසන පද්ධතියේ නිදන්ගත රෝග | <input type="checkbox"/> | <input type="checkbox"/> | <input type="checkbox"/> | K11 d |
|                                                                                                   | 5. අක්මාවේ ආසාදන (හෙපටයිටිස්) | <input type="checkbox"/> | <input type="checkbox"/> | <input type="checkbox"/> | K11 e |

| මධ්‍යසාරය                                                                                      |                                |                          |  |  |       |
|------------------------------------------------------------------------------------------------|--------------------------------|--------------------------|--|--|-------|
| 72. මධ්‍යසාර භාවිතය ශරීරයට අගුණ වේ. මධ්‍යසාර භාවිතය නිසා හානි සිදුවිය හැකි ඉන්ද්‍රියන් කවරක්ද? | 1. අක්මාව                      | <input type="checkbox"/> |  |  | K12 a |
|                                                                                                | 2. ආමාශය                       | <input type="checkbox"/> |  |  | K12 b |
|                                                                                                | 3. අග්නිජාශය                   | <input type="checkbox"/> |  |  | K12 c |
|                                                                                                | 4. මොළය                        | <input type="checkbox"/> |  |  | K12 d |
|                                                                                                | 5. හෘදය                        | <input type="checkbox"/> |  |  | K12 e |
|                                                                                                | 6. ස්නායු                      | <input type="checkbox"/> |  |  | K12 f |
| 73. මධ්‍යසාර භාවිතය නිසා වැලඳිය හැකි රෝගාබාධ කවරක්ද?                                           | 1. බඩේ දැවල්ල (ගැස්ට්‍රයිටිස්) | <input type="checkbox"/> |  |  | K13 a |
|                                                                                                | 2. ආමාශගත තුවාල                | <input type="checkbox"/> |  |  | K13 b |
|                                                                                                | 3. අක්මාවේ සිරෝසිස් තත්ත්වය    | <input type="checkbox"/> |  |  | K13 c |
|                                                                                                | 4. අග්නිජාශික ප්‍රදාහය         | <input type="checkbox"/> |  |  | K13 d |
|                                                                                                | 5. හෘදයාබාධ                    | <input type="checkbox"/> |  |  | K13 e |
|                                                                                                | 6. මානසික රෝගී තත්ත්වයන්       | <input type="checkbox"/> |  |  | K13 f |

**06 බෝ නොවන රෝග හා ජීවයේ ප්‍රාථමික සංරක්ෂණ ක්‍රම පිලිබදව දැනුම ලබාගත් මාධ්‍යය**

|                                                                                                                           |                                                                   |                          |  |  |          |
|---------------------------------------------------------------------------------------------------------------------------|-------------------------------------------------------------------|--------------------------|--|--|----------|
| 74. ඉහත රෝගයන් හා ජීවයේ ප්‍රාථමික සංරක්ෂණ ක්‍රම පිලිබදව දැනුම ලැබූ මාධ්‍ය වන්නේ (ප්‍රමුඛතාව මත 1 2 3 4 5 6 7 ආදිය යොදන්න) | 1. පාසැල                                                          | <input type="checkbox"/> |  |  | M1 a     |
|                                                                                                                           | 2. දෙමාපියන්                                                      | <input type="checkbox"/> |  |  | M1 b     |
|                                                                                                                           | 3. යහළුවන්                                                        | <input type="checkbox"/> |  |  | M1 c     |
|                                                                                                                           | 4. රුපවාහිණිය                                                     | <input type="checkbox"/> |  |  | M1 d     |
|                                                                                                                           | 5. ශුවන් විදුලිය                                                  | <input type="checkbox"/> |  |  | M1 e     |
|                                                                                                                           | 6. සෞඛ්‍ය ක්ෂේත්‍රයේ රාජකාරී නියතුවන (වෛද්‍යවරුන් / හෙදනිලධාරීන්) | <input type="checkbox"/> |  |  | M1 f     |
|                                                                                                                           | 7. පුවත්පත් සඟරා මගින්                                            | <input type="checkbox"/> |  |  | M1 g     |
|                                                                                                                           | 8. වෙනත් (සඳහන් කරන්න) .....                                      |                          |  |  | M1 Other |

|                                                                                                          |                                                           |                          |             |
|----------------------------------------------------------------------------------------------------------|-----------------------------------------------------------|--------------------------|-------------|
| 75. බෝ නොවන රෝග පිලිබඳ දැනුම ඔබ ලබා ගැනීමට කැමති මාධ්‍යය වන්නේ (ප්‍රමුඛතාව මත 1 2 3 4 5 6 7 ආදිය යොදන්න) | 1. පාසැල                                                  | <input type="checkbox"/> | M2 a        |
|                                                                                                          | 2. දෙමාපියන්                                              | <input type="checkbox"/> | M2 b        |
|                                                                                                          | 3. යහළුවන්                                                | <input type="checkbox"/> | M2 c        |
|                                                                                                          | 4. රූපවාණිය                                               | <input type="checkbox"/> | M2 d        |
|                                                                                                          | 5. ගුවන් විදුලිය                                          | <input type="checkbox"/> | M2 e        |
|                                                                                                          | 6. සෞඛ්‍ය සේවයේ නියතුවුවන්<br>(උදා- වෛද්‍යවරුන්/ හෙදියන්) | <input type="checkbox"/> | M2 f        |
|                                                                                                          | 7. පුවත්පත් සඟරා මගින්                                    | <input type="checkbox"/> | M2 g        |
|                                                                                                          | 8. අනන්‍ය (සඳහන් කරන්න) .....                             |                          | M2<br>Other |
